# Supplementary material for: Inhibition of LSD1 epigenetically attenuates oral cancer growth and metastasis
Source: PubMed Central journal article supplement (PMC5650269; doi:10.18632/oncotarget.19637), 2017-07-27
Supplement: oncotarget-08-73372-s001.pdf [file oncotarget-08-73372-s001.pdf]

# Inhibition of LSD1 epigenetically attenuates oral cancer growth and metastasis

## SUPPLEMENTARY MATERIALS

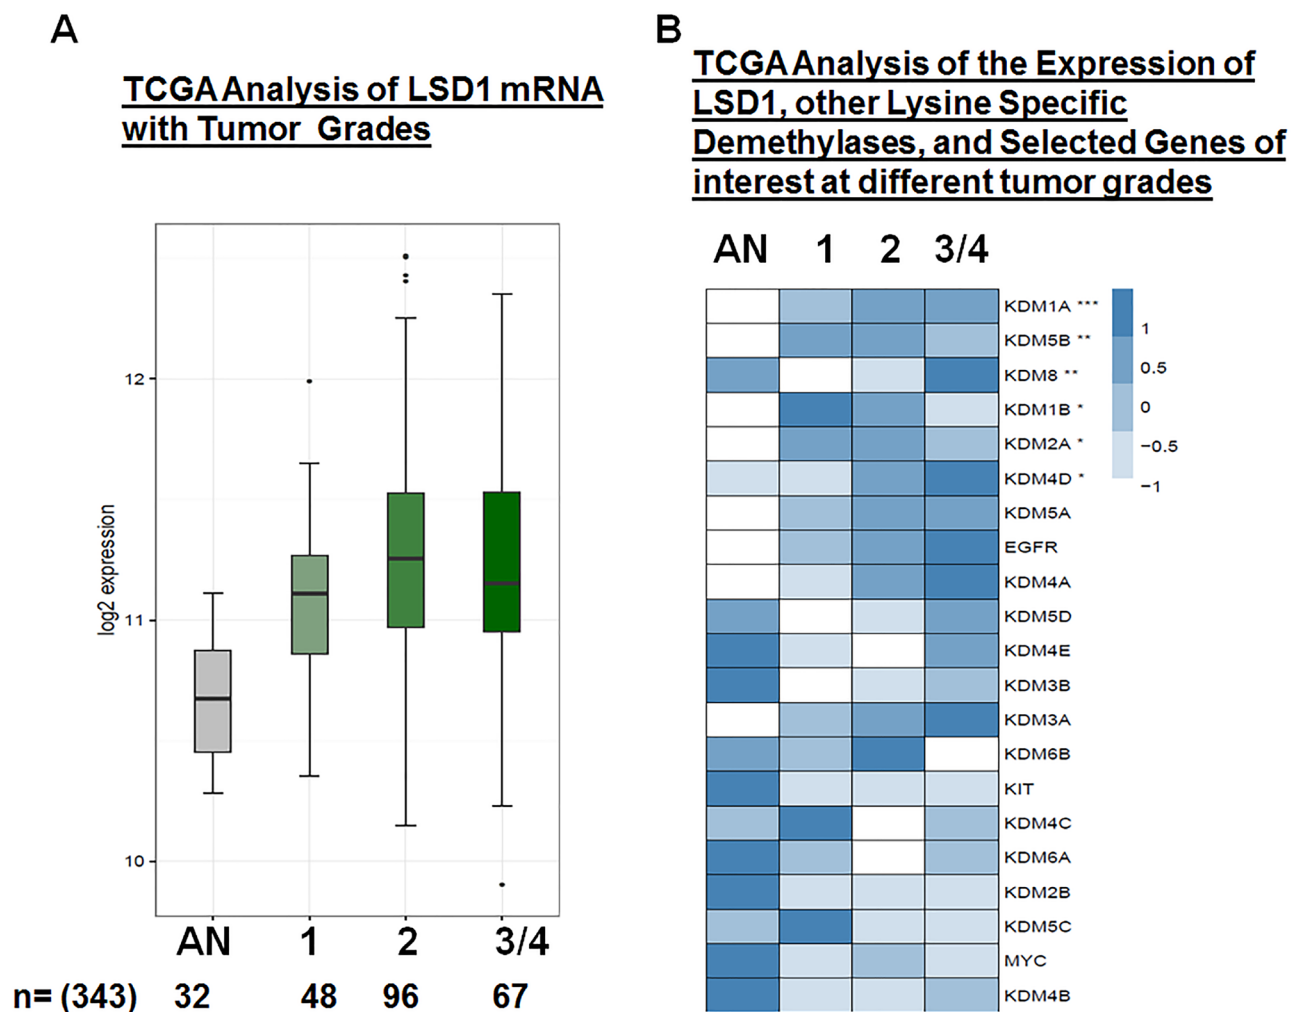

**Supplementary Figure 1: LSD1 expression with tumor grades:** A) TCGA analysis of the average LSD1 mRNA expression in different grade tumors compared to adjacent normal (AN) tongue tissue. B) A heatmap of the TCGA analysis showing average expression levels (row Z-scores) for the 21 genes of interest (ranked in increasing order of their FDR value, \*\*\*FDR<0.0001, \*\*FDR<0.01 and \*FDR<0.05) with respect to expression of LSD1.

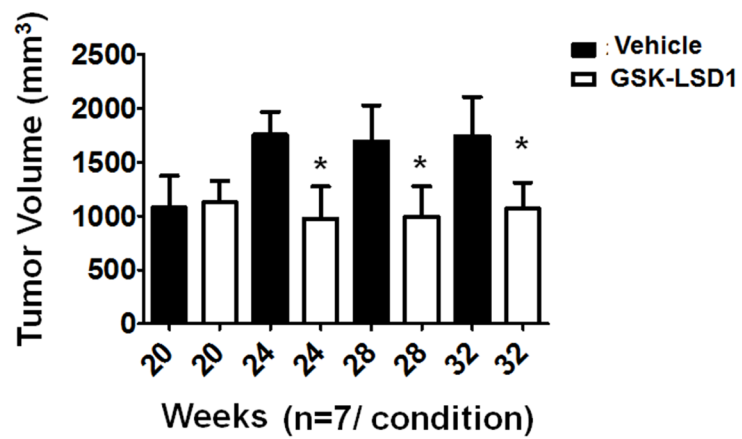

**Supplementary Figure 2: GSK-LSD1 injection at 20 weeks inhibited the growth of pre-existing tumors in a PDX model (n=7 per condition).** Statistical analyses were performed with unpaired Student's t-tests. \* P-value<0.05.

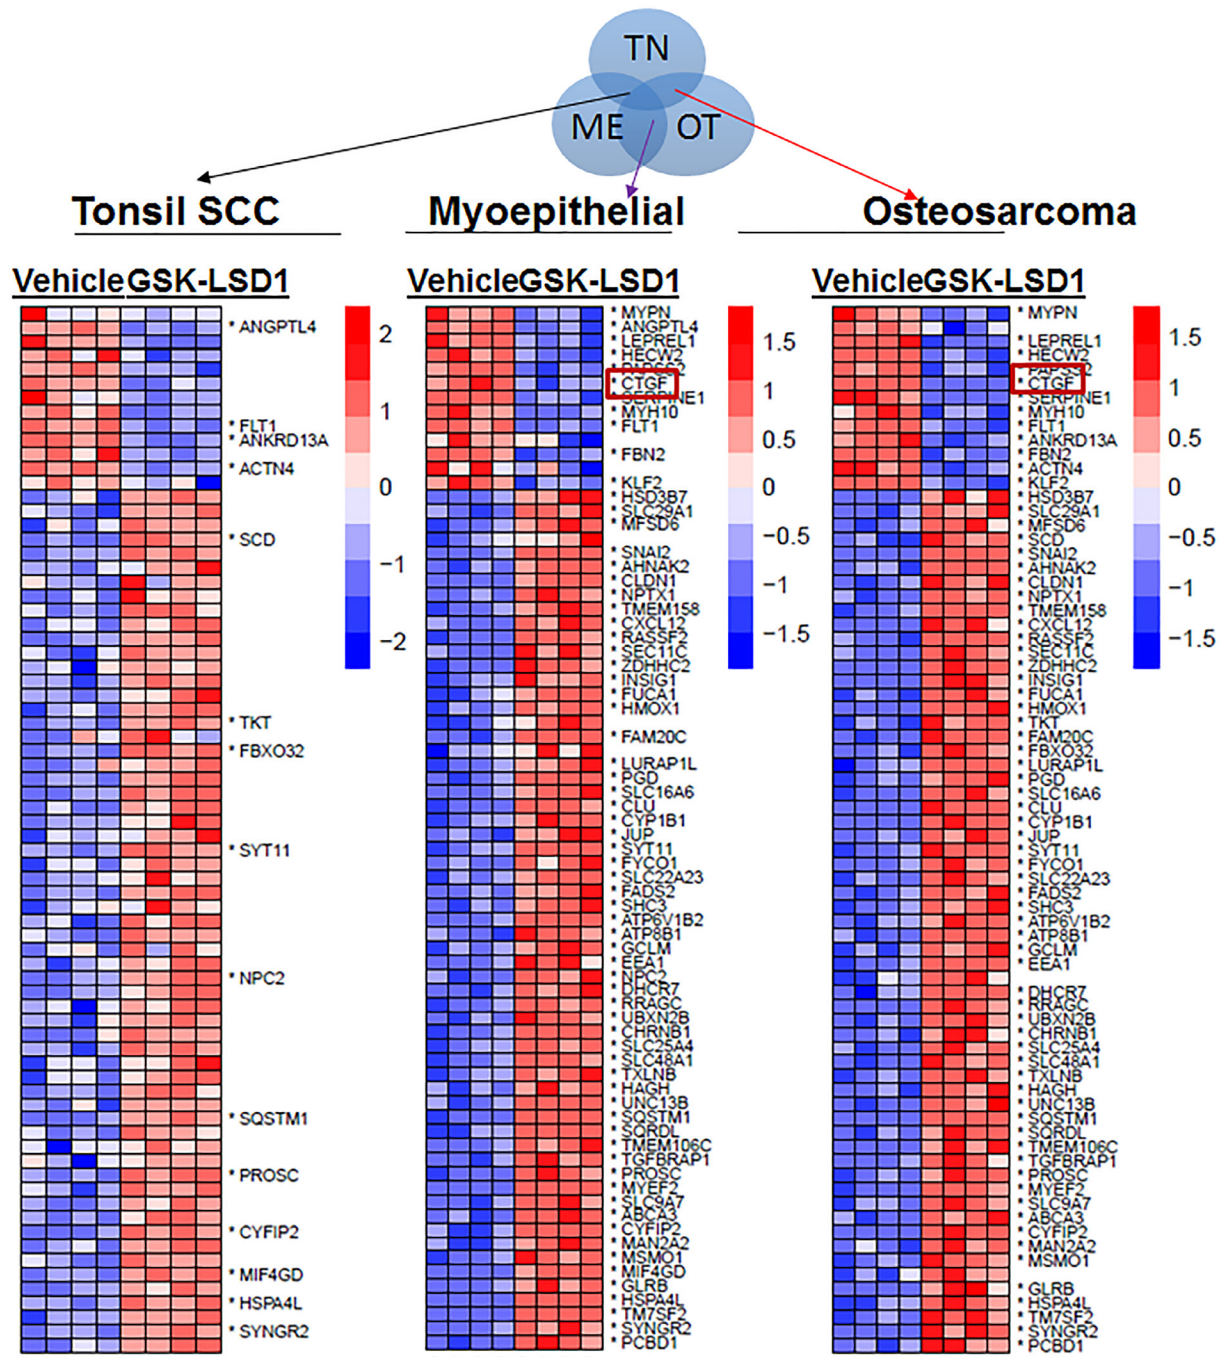

Supplementary Figure 3: Detailed gene signatures showing similarity in genes inhibited or activated by GSK-LSD1 compared to vehicle in patient-derived primary cells isolated from tumors.

For Supplementary Tables 1 and 2 See Supplementary Files
