# Supplementary material for: Inhibition of LSD1 epigenetically attenuates oral cancer growth and metastasis
Source: PubMed Central journal article supplement (PMC5650269; doi:10.18632/oncotarget.19637), 2017-07-27
Supplement: oncotarget-08-73372-s002.pdf [file oncotarget-08-73372-s002.pdf]

FDR q-value      Name of Oncogenic signature

**Upregulated in TN**

|          |                        |
|----------|------------------------|
| 0.00E+00 | CSR_LATE_UP.V1_DN      |
| 1.28E-03 | RB_P107_DN.V1_DN       |
| 2.38E-03 | SIRNA_EIF4GI_UP        |
| 3.53E-03 | KRAS.DF.V1_UP          |
| 6.47E-03 | AKT_UP.V1_UP           |
| 6.08E-03 | RB_P130_DN.V1_DN       |
| 5.41E-03 | RPS14_DN.V1_UP         |
| 5.07E-03 | MTOR_UP.N4.V1_UP       |
| 5.14E-03 | STK33_UP               |
| 4.94E-03 | STK33_NOMO_UP          |
| 5.78E-03 | PRC2_EZH2_UP.V1_DN     |
| 6.45E-03 | BCAT.100_UP.V1_UP      |
| 8.70E-03 | MTOR_UP.V1_UP          |
| 1.35E-02 | MEL18_DN.V1_UP         |
| 1.27E-02 | RB_DN.V1_DN            |
| 1.57E-02 | P53_DN.V1_UP           |
| 1.76E-02 | NFE2L2.V2              |
| 1.76E-02 | AKT_UP_MTOR_DN.V1_UP   |
| 2.18E-02 | TBK1.DN.48HRS_DN       |
| 2.19E-02 | EIF4E_UP               |
| 2.37E-02 | STK33_SKM_UP           |
| 2.39E-02 | PIGF_UP.V1_UP          |
| 2.43E-02 | ERB2_UP.V1_DN          |
| 2.71E-02 | LEF1_UP.V1_DN          |
| 2.88E-02 | LTE2_UP.V1_DN          |
| 3.08E-02 | MEK_UP.V1_DN           |
| 3.11E-02 | HOXA9_DN.V1_UP         |
| 3.39E-02 | PTEN_DN.V2_UP          |
| 3.35E-02 | STK33_NOMO_DN          |
| 4.39E-02 | BMI1_DN.V1_DN          |
| 4.36E-02 | ATF2_UP.V1_DN          |
| 4.28E-02 | CAMP_UP.V1_UP          |
| 4.57E-02 | BMI1_DN.V1_UP          |
| 4.81E-02 | STK33_SKM_DN           |
| 4.99E-02 | P53_DN.V1_DN           |
| 5.76E-02 | EGFR_UP.V1_DN          |
| 8.95E-02 | STK33_DN               |
| 9.43E-02 | TBK1.DF_UP             |
| 9.47E-02 | JNK_DN.V1_UP           |
| 1.11E-01 | E2F1_UP.V1_DN          |
| 1.09E-01 | HOXA9_DN.V1_DN         |
| 1.16E-01 | MEK_UP.V1_UP           |
| 1.28E-01 | BMI1_DN_MEL18_DN.V1_DN |
| 1.27E-01 | WNT_UP.V1_DN           |
| 1.45E-01 | PTEN_DN.V1_DN          |
| 1.47E-01 | KRAS.50_UP.V1_DN       |

|          |                               |
|----------|-------------------------------|
| 1.49E-01 | IL21_UP.V1_UP                 |
| 1.52E-01 | ESC_V6.5_UP_LATE.V1_UP        |
| 1.57E-01 | ERB2_UP.V1_UP                 |
| 1.70E-01 | ALK_DN.V1_UP                  |
| 1.73E-01 | NOTCH_DN.V1_UP                |
| 1.85E-01 | ESC_J1_UP_LATE.V1_UP          |
| 1.99E-01 | KRAS.KIDNEY_UP.V1_DN          |
| 2.03E-01 | GLI1_UP.V1_DN                 |
| 2.02E-01 | BMI1_DN_MEL18_DN.V1_UP        |
| 2.06E-01 | KRAS.LUNG.BREAST_UP.V1_DN     |
| 2.02E-01 | RB_P130_DN.V1_UP              |
| 2.01E-01 | WNT_UP.V1_UP                  |
| 2.00E-01 | SNF5_DN.V1_UP                 |
| 2.20E-01 | IL15_UP.V1_DN                 |
| 2.21E-01 | AKT_UP.V1_DN                  |
| 2.26E-01 | KRAS.600.LUNG.BREAST_UP.V1_DN |
| 2.32E-01 | LTE2_UP.V1_UP                 |
| 2.44E-01 | BCAT_BILD_ET_AL_UP            |
| 2.43E-01 | KRAS.LUNG_UP.V1_UP            |
| 2.39E-01 | ATF2_S_UP.V1_DN               |
| 2.43E-01 | CTIP_DN.V1_UP                 |
| 2.49E-01 | KRAS.300_UP.V1_DN             |
| 2.51E-01 | TBK1.DN.48HRS_UP              |

#### **Downregulated in TN**

|          |                                    |
|----------|------------------------------------|
| 6.34E-03 | CORDENONSI_YAP_CONSERVED_SIGNATURE |
| 4.68E-03 | E2F1_UP.V1_UP                      |
| 2.96E-02 | PRC2_EDD_UP.V1_UP                  |
| 4.71E-02 | TGFB_UP.V1_UP                      |
| 9.56E-02 | EGFR_UP.V1_UP                      |
| 1.28E-01 | KRAS.PROSTATE_UP.V1_UP             |
| 1.43E-01 | MYC_UP.V1_DN                       |
| 1.45E-01 | RAPA_EARLY_UP.V1_UP                |
| 2.13E-01 | RPS14_DN.V1_DN                     |
| 2.42E-01 | GCNP_SHH_UP_LATE.V1_UP             |
| 2.39E-01 | RAF_UP.V1_DN                       |

#### **Upregulated in ME**

| FDR q-val | NAME              |
|-----------|-------------------|
| 0.00E+00  | CSR_LATE_UP.V1_DN |
| 0.00E+00  | ATF2_UP.V1_DN     |
| 0.00E+00  | STK33_UP          |
| 2.92E-04  | PIGF_UP.V1_UP     |
| 1.16E-03  | SIRNA_EIF4GI_UP   |
| 1.17E-03  | MTOR_UP.N4.V1_UP  |
| 9.99E-04  | STK33_NOMO_UP     |
| 1.16E-03  | RPS14_DN.V1_UP    |
| 1.17E-03  | RB_P107_DN.V1_DN  |
| 1.28E-03  | MEK_UP.V1_DN      |
| 1.37E-03  | RB_P130_DN.V1_DN  |

|          |                        |
|----------|------------------------|
| 1.35E-03 | HOXA9_DN.V1_UP         |
| 1.25E-03 | ATF2_S_UP.V1_DN        |
| 1.16E-03 | LTE2_UP.V1_UP          |
| 1.38E-03 | PRC2_EZH2_UP.V1_DN     |
| 1.44E-03 | STK33_SKM_UP           |
| 1.62E-03 | MEL18_DN.V1_UP         |
| 1.65E-03 | P53_DN.V1_UP           |
| 1.87E-03 | RAF_UP.V1_UP           |
| 2.00E-03 | BMI1_DN.V1_UP          |
| 2.07E-03 | EGFR_UP.V1_UP          |
| 2.83E-03 | P53_DN.V1_DN           |
| 2.89E-03 | EIF4E_DN               |
| 2.77E-03 | STK33_DN               |
| 2.80E-03 | BMI1_DN_MEL18_DN.V1_UP |
| 2.69E-03 | TBK1.DF_DN             |
| 2.59E-03 | ESC_J1_UP_LATE.V1_UP   |
| 2.79E-03 | CSR_EARLY_UP.V1_DN     |
| 3.75E-03 | TBK1.DN.48HRS_UP       |
| 4.37E-03 | STK33_NOMO_DN          |
| 4.34E-03 | ESC_J1_UP_EARLY.V1_UP  |
| 5.05E-03 | PRC2_EDD_UP.V1_DN      |
| 4.93E-03 | LEF1_UP.V1_DN          |
| 4.82E-03 | EGFR_UP.V1_DN          |
| 4.75E-03 | STK33_SKM_DN           |
| 4.98E-03 | TBK1.DF_UP             |
| 7.25E-03 | CAMP_UP.V1_DN          |
| 7.87E-03 | KRAS.KIDNEY_UP.V1_UP   |
| 8.20E-03 | TBK1.DN.48HRS_DN       |
| 9.00E-03 | CAMP_UP.V1_UP          |
| 8.97E-03 | KRAS.DF.V1_UP          |
| 1.05E-02 | SNF5_DN.V1_DN          |
| 1.18E-02 | JNK_DN.V1_UP           |
| 1.60E-02 | NFE2L2.V2              |
| 2.29E-02 | ERB2_UP.V1_DN          |
| 2.29E-02 | EIF4E_UP               |
| 2.25E-02 | KRAS.600_UP.V1_UP      |
| 2.23E-02 | AKT_UP_MTOR_DN.V1_UP   |
| 2.19E-02 | RB_DN.V1_DN            |
| 2.16E-02 | HOXA9_DN.V1_DN         |
| 2.47E-02 | MEK_UP.V1_UP           |
| 2.47E-02 | ERB2_UP.V1_UP          |
| 2.45E-02 | E2F1_UP.V1_DN          |
| 2.41E-02 | BCAT_BILD_ET_AL_UP     |
| 2.65E-02 | YAP1_UP                |
| 2.61E-02 | BMI1_DN.V1_DN          |
| 3.36E-02 | PDGF_ERK_DN.V1_UP      |
| 3.34E-02 | PTEN_DN.V2_UP          |
| 4.10E-02 | BCAT_GDS748_DN         |
| 4.09E-02 | KRAS.300_UP.V1_UP      |

|          |                        |
|----------|------------------------|
| 4.61E-02 | MTOR_UP.N4.V1_DN       |
| 4.97E-02 | VEGF_A_UP.V1_UP        |
| 5.58E-02 | MTOR_UP.V1_UP          |
| 5.59E-02 | IL15_UP.V1_DN          |
| 6.73E-02 | KRAS.50_UP.V1_UP       |
| 7.73E-02 | IL2_UP.V1_DN           |
| 7.75E-02 | RAF_UP.V1_DN           |
| 9.55E-02 | AKT_UP.V1_DN           |
| 9.88E-02 | MTOR_UP.V1_DN          |
| 1.17E-01 | BCAT.100_UP.V1_UP      |
| 1.49E-01 | SIRNA_EIF4GI_DN        |
| 1.58E-01 | P53_DN.V2_DN           |
| 1.57E-01 | CAHOY_ASTROGLIAL       |
| 1.81E-01 | BMI1_DN_MEL18_DN.V1_DN |
| 1.81E-01 | GLI1_UP.V1_DN          |
| 1.85E-01 | VEGF_A_UP.V1_DN        |
| 1.85E-01 | LEF1_UP.V1_UP          |
| 1.84E-01 | AKT_UP.V1_UP           |
| 1.84E-01 | IL15_UP.V1_UP          |
| 1.83E-01 | NOTCH_DN.V1_UP         |
| 1.91E-01 | ESC_V6.5_UP_LATE.V1_UP |
| 1.97E-01 | ALK_DN.V1_UP           |
| 2.08E-01 | WNT_UP.V1_DN           |
| 2.12E-01 | ATF2_S_UP.V1_UP        |
| 2.19E-01 | JAK2_DN.V1_DN          |
| 2.29E-01 | PRC2_SUZ12_UP.V1_DN    |
| 2.40E-01 | ESC_J1_UP_EARLY.V1_DN  |

#### **Downregulated in ME**

|          |                                           |
|----------|-------------------------------------------|
| 1.85E-01 | TGFB_UP.V1_UP                             |
| 1.73E-01 | <u>CORDENONSI YAP CONSERVED SIGNATURE</u> |
| 1.28E-01 | CSR_LATE_UP.V1_UP                         |
| 1.02E-01 | ALK_DN.V1_DN                              |
| 1.39E-01 | CSR_EARLY_UP.V1_UP                        |
| 1.41E-01 | DCA_UP.V1_UP                              |
| 1.38E-01 | ESC_J1_UP_LATE.V1_DN                      |
| 1.94E-01 | ESC_V6.5_UP_EARLY.V1_DN                   |
| 1.91E-01 | RB_P107_DN.V1_UP                          |
| 1.92E-01 | PRC2_SUZ12_UP.V1_UP                       |
| 1.91E-01 | NRL_DN.V1_UP                              |
| 2.07E-01 | IL2_UP.V1_UP                              |

#### **Upregulated in OT**

| FDR q-val | NAME               |
|-----------|--------------------|
| 0.00E+00  | ATF2_UP.V1_DN      |
| 0.00E+00  | CSR_LATE_UP.V1_DN  |
| 4.24E-04  | PRC2_EZH2_UP.V1_DN |
| 5.45E-03  | ERB2_UP.V1_UP      |
| 5.22E-03  | BCAT.100_UP.V1_UP  |
| 4.35E-03  | NFE2L2.V2          |

|          |                                  |
|----------|----------------------------------|
| 7.39E-03 | EIF4E_DN                         |
| 8.77E-03 | P53_DN.V1_DN                     |
| 8.54E-03 | PRC2_EDD_UP.V1_DN                |
| 1.18E-02 | RPS14_DN.V1_UP                   |
| 1.36E-02 | RB_P130_DN.V1_DN                 |
| 1.30E-02 | MEK_UP.V1_DN                     |
| 1.22E-02 | ATF2_S_UP.V1_DN                  |
| 1.32E-02 | SIRNA EIF4GI_UP                  |
| 1.40E-02 | HOXA9_DN.V1_UP                   |
| 1.49E-02 | VEGF_A_UP.V1_UP                  |
| 1.47E-02 | MEK_UP.V1_UP                     |
| 1.38E-02 | SINGH_KRAS_DEPENDENCY_SIGNATURE_ |
| 1.37E-02 | MTOR_UP.N4.V1_UP                 |
| 1.56E-02 | PRC2_SUZ12_UP.V1_DN              |
| 1.50E-02 | KRAS.50_UP.V1_UP                 |
| 1.61E-02 | AKT_UP.V1_UP                     |
| 1.86E-02 | KRAS.600.LUNG.BREAST_UP.V1_DN    |
| 2.01E-02 | BMI1_DN.V1_DN                    |
| 2.12E-02 | MEL18_DN.V1_DN                   |
| 2.36E-02 | LTE2_UP.V1_UP                    |
| 2.39E-02 | ESC_J1_UP_EARLY.V1_UP            |
| 2.67E-02 | E2F1_UP.V1_DN                    |
| 2.80E-02 | RAF_UP.V1_UP                     |
| 3.25E-02 | KRAS.LUNG.BREAST_UP.V1_DN        |
| 3.14E-02 | IL21_UP.V1_DN                    |
| 4.02E-02 | MTOR_UP.V1_UP                    |
| 4.61E-02 | YAP1_DN                          |
| 4.49E-02 | STK33_SKM_DN                     |
| 5.43E-02 | IL15_UP.V1_DN                    |
| 5.47E-02 | BCAT_GDS748_DN                   |
| 5.43E-02 | LEF1_UP.V1_DN                    |
| 5.32E-02 | KRAS.KIDNEY_UP.V1_UP             |
| 6.52E-02 | STK33_NOMO_UP                    |
| 6.37E-02 | KRAS.BREAST_UP.V1_DN             |
| 6.63E-02 | STK33_UP                         |
| 6.73E-02 | JNK_DN.V1_UP                     |
| 7.38E-02 | KRAS.LUNG_UP.V1_DN               |
| 7.39E-02 | STK33_NOMO_DN                    |
| 7.49E-02 | PTEN_DN.V2_UP                    |
| 7.32E-02 | MEL18_DN.V1_UP                   |
| 7.63E-02 | STK33_SKM_UP                     |
| 8.07E-02 | AKT_UP_MTOR_DN.V1_DN             |
| 8.33E-02 | IL2_UP.V1_DN                     |
| 8.42E-02 | AKT_UP_MTOR_DN.V1_UP             |
| 8.42E-02 | STK33_DN                         |
| 8.30E-02 | BCAT.100_UP.V1_DN                |
| 8.44E-02 | BMI1_DN_MEL18_DN.V1_DN           |
| 8.82E-02 | CTIP_DN.V1_UP                    |
| 9.07E-02 | P53_DN.V1_UP                     |

|          |                     |
|----------|---------------------|
| 8.92E-02 | RB_DN.V1_DN         |
| 1.02E-01 | JAK2_DN.V1_UP       |
| 1.02E-01 | KRAS.300_UP.V1_DN   |
| 1.17E-01 | NOTCH_DN.V1_UP      |
| 1.19E-01 | AKT_UP.V1_DN        |
| 1.34E-01 | KRAS.600_UP.V1_DN   |
| 1.38E-01 | PIGF_UP.V1_UP       |
| 1.48E-01 | MTOR_UP.V1_DN       |
| 1.54E-01 | IL21_UP.V1_UP       |
| 1.73E-01 | CYCLIN_D1_KE_.V1_DN |
| 1.75E-01 | CSR_EARLY_UP.V1_DN  |
| 1.75E-01 | KRAS.DF.V1_UP       |
| 1.93E-01 | PKCA_DN.V1_UP       |
| 1.95E-01 | TGFB_UP.V1_DN       |
| 2.05E-01 | KRAS.50_UP.V1_DN    |
| 2.12E-01 | EGFR_UP.V1_DN       |
| 2.14E-01 | KRAS.600_UP.V1_UP   |
| 2.22E-01 | PRC1_BMI_UP.V1_DN   |
| 2.22E-01 | LTE2_UP.V1_DN       |
| 2.26E-01 | RB_P107_DN.V1_DN    |
| 2.33E-01 | CAHOY_ASTROCYTIC    |
| 2.55E-01 | NOTCH_DN.V1_DN      |

#### Downregulated in OT

| FDR q-val | Name                               |
|-----------|------------------------------------|
| 0.00E+00  | CORDENONSI_YAP_CONSERVED_SIGNATURE |
| 0.00E+00  | CSR_LATE_UP.V1_UP                  |
| 2.20E-04  | E2F1_UP.V1_UP                      |
| 1.65E-04  | CSR_EARLY_UP.V1_UP                 |
| 2.86E-04  | RB_P107_DN.V1_UP                   |
| 2.38E-04  | RPS14_DN.V1_DN                     |
| 1.17E-03  | SIRNA_EIF4GI_DN                    |
| 2.32E-03  | VEGF_A_UP.V1_DN                    |
| 2.31E-03  | ESC_V6.5_UP_EARLY.V1_DN            |
| 3.50E-03  | HINATA_NFKB_IMMUN_INF              |
| 3.59E-03  | GCNP_SHH_UP_EARLY.V1_UP            |
| 5.71E-03  | BMI1_DN_MEL18_DN.V1_UP             |
| 6.11E-03  | TGFB_UP.V1_UP                      |
| 8.34E-03  | PRC2_EZH2_UP.V1_UP                 |
| 8.88E-03  | PDGF_ERK_DN.V1_DN                  |
| 1.05E-02  | ESC_J1_UP_EARLY.V1_DN              |
| 1.96E-02  | GCNP_SHH_UP_LATE.V1_UP             |
| 3.62E-02  | PDGF_UP.V1_UP                      |
| 3.57E-02  | ESC_J1_UP_LATE.V1_UP               |
