# Supplementary material for: Inhibition of LSD1 epigenetically attenuates oral cancer growth and metastasis
Source: PubMed Central journal article supplement (PMC5650269; doi:10.18632/oncotarget.19637), 2017-07-27
Supplement: oncotarget-08-73372-s003.pdf [file oncotarget-08-73372-s003.pdf]

| <b>FDR q-value</b>         | <b>Name of hallmark geneset</b>            |
|----------------------------|--------------------------------------------|
| <b>Upregulated in TN</b>   |                                            |
| 0.00E+00                   | HALLMARK_CHOLESTEROL_HOMEOSTASIS           |
| 0.00E+00                   | HALLMARK_MTORC1_SIGNALING                  |
| 0.00E+00                   | HALLMARK_OXIDATIVE_PHOSPHORYLATION         |
| 0.00E+00                   | HALLMARK_INTERFERON_ALPHA_RESPONSE         |
| 6.78E-04                   | HALLMARK_BILE_ACID_METABOLISM              |
| 5.65E-04                   | HALLMARK_REACTIVE_OXIGEN_SPECIES_PATHWAY   |
| 4.85E-04                   | <u>HALLMARK_P53_PATHWAY</u>                |
| 4.24E-04                   | HALLMARK_INTERFERON_GAMMA_RESPONSE         |
| 3.77E-04                   | HALLMARK_UV_RESPONSE_UP                    |
| 3.39E-04                   | HALLMARK_XENOBIOTIC_METABOLISM             |
| 2.04E-03                   | HALLMARK_PEROXISOME                        |
| 2.73E-03                   | <u>HALLMARK_APOPTOSIS</u>                  |
| 3.46E-03                   | HALLMARK_ESTROGEN_RESPONSE_LATE            |
| 3.50E-03                   | HALLMARK_FATTY_ACID_METABOLISM             |
| 3.27E-03                   | HALLMARK_ADIPOGENESIS                      |
| 4.53E-03                   | HALLMARK_ANDROGEN_RESPONSE                 |
| 7.30E-03                   | HALLMARK_PROTEIN_SECRETION                 |
| 8.19E-03                   | HALLMARK_MYOGENESIS                        |
| 1.71E-02                   | HALLMARK_IL6_JAK_STAT3_SIGNALING           |
| 1.65E-02                   | HALLMARK_COAGULATION                       |
| 1.68E-02                   | HALLMARK_HEME_METABOLISM                   |
| 1.77E-02                   | HALLMARK_MYC_TARGETS_V1                    |
| 1.69E-02                   | HALLMARK_COMPLEMENT                        |
| 3.51E-02                   | HALLMARK_ESTROGEN_RESPONSE_EARLY           |
| 5.04E-02                   | HALLMARK_EPITHELIAL_MESENCHYMAL_TRANSITION |
| 6.08E-02                   | HALLMARK_TNFA_SIGNALING_VIA_NFKB           |
| 6.72E-02                   | HALLMARK_KRAS_SIGNALING_UP                 |
| 6.62E-02                   | HALLMARK_GLYCOLYSIS                        |
| 1.16E-01                   | HALLMARK_IL2_STAT5_SIGNALING               |
| 1.23E-01                   | HALLMARK_UNFOLDED_PROTEIN_RESPONSE         |
| 1.30E-01                   | HALLMARK_INFLAMMATORY_RESPONSE             |
| 1.74E-01                   | HALLMARK_ANGIOGENESIS                      |
| <b>Downregulated in TN</b> |                                            |
| 3.48E-02                   | HALLMARK_MITOTIC_SPINDLE                   |
| 2.25E-02                   | HALLMARK_UV_RESPONSE_DN                    |
| 1.60E-02                   | HALLMARK_APICAL_JUNCTION                   |
| 2.81E-02                   | HALLMARK_MYC_TARGETS_V2                    |
| 5.77E-02                   | HALLMARK_E2F_TARGETS                       |
| 9.82E-02                   | HALLMARK_G2M_CHECKPOINT                    |
| 1.14E-01                   | HALLMARK_HYPOXIA                           |
| <b>Upregulated in ME</b>   |                                            |
| 0.00E+00                   | HALLMARK_OXIDATIVE_PHOSPHORYLATION         |
| 0.00E+00                   | HALLMARK_CHOLESTEROL_HOMEOSTASIS           |
| 0.00E+00                   | HALLMARK_MTORC1_SIGNALING                  |

|          |                                            |
|----------|--------------------------------------------|
| 0.00E+00 | HALLMARK_REACTIVE_OXIGEN_SPECIES_PATHWAY   |
| 0.00E+00 | HALLMARK_PROTEIN_SECRETION                 |
| 0.00E+00 | HALLMARK_ADIPOGENESIS                      |
| 0.00E+00 | HALLMARK_HEME_METABOLISM                   |
| 4.51E-04 | HALLMARK_BILE_ACID_METABOLISM              |
| 4.01E-04 | HALLMARK_MYOGENESIS                        |
| 1.66E-03 | HALLMARK_FATTY_ACID_METABOLISM             |
| 1.82E-03 | HALLMARK_P53_PATHWAY                       |
| 2.84E-03 | HALLMARK_PEROXISOME                        |
| 3.08E-03 | HALLMARK_KRAS_SIGNALING_UP                 |
| 3.44E-03 | HALLMARK_ESTROGEN_RESPONSE_LATE            |
| 4.96E-03 | HALLMARK_APOPTOSIS                         |
| 4.86E-03 | HALLMARK_EPITHELIAL_MESENCHYMAL_TRANSITION |
| 4.85E-03 | HALLMARK_COAGULATION                       |
| 5.22E-03 | HALLMARK_XENOBIOTIC_METABOLISM             |
| 1.18E-02 | HALLMARK_COMPLEMENT                        |
| 1.83E-02 | HALLMARK_UV_RESPONSE_DN                    |
| 1.80E-02 | HALLMARK_ESTROGEN_RESPONSE_EARLY           |
| 1.94E-02 | HALLMARK_DNA_REPAIR                        |
| 2.02E-02 | HALLMARK_UNFOLDED_PROTEIN_RESPONSE         |
| 3.21E-02 | HALLMARK_PI3K_AKT_MTOR_SIGNALING           |
| 3.12E-02 | HALLMARK_ANGIOGENESIS                      |
| 5.10E-02 | HALLMARK_UV_RESPONSE_UP                    |
| 4.93E-02 | HALLMARK_APICAL_SURFACE                    |
| 4.98E-02 | HALLMARK_MYC_TARGETS_V1                    |
| 6.92E-02 | HALLMARK_ANDROGEN_RESPONSE                 |
| 8.27E-02 | HALLMARK_IL2_STAT5_SIGNALING               |
| 9.34E-02 | HALLMARK_GLYCOLYSIS                        |
| 1.98E-01 | HALLMARK_INFLAMMATORY_RESPONSE             |

**Downregulated in ME**

|          |                                     |
|----------|-------------------------------------|
| 1.49E-03 | HALLMARK_E2F_TARGETS                |
| 2.03E-03 | HALLMARK_G2M_CHECKPOINT             |
| 1.36E-03 | HALLMARK_WNT_BETA_CATENIN_SIGNALING |
| 1.60E-01 | HALLMARK_TNFA_SIGNALING_VIA_NFKB    |
| 1.64E-01 | HALLMARK_MITOTIC_SPINDLE            |
| 2.34E-01 | HALLMARK_HYPOXIA                    |

**Upregulated in OT**

|          |                                          |
|----------|------------------------------------------|
| 0.00E+00 | HALLMARK_INTERFERON_ALPHA_RESPONSE       |
| 0.00E+00 | HALLMARK_INTERFERON_GAMMA_RESPONSE       |
| 0.00E+00 | HALLMARK_CHOLESTEROL_HOMEOSTASIS         |
| 7.36E-04 | HALLMARK_XENOBIOTIC_METABOLISM           |
| 9.04E-04 | HALLMARK_P53_PATHWAY                     |
| 9.26E-04 | HALLMARK_BILE_ACID_METABOLISM            |
| 7.94E-04 | HALLMARK_REACTIVE_OXIGEN_SPECIES_PATHWAY |
| 4.55E-03 | HALLMARK_COAGULATION                     |
| 5.92E-03 | HALLMARK_FATTY_ACID_METABOLISM           |

|          |                                    |
|----------|------------------------------------|
| 5.48E-03 | HALLMARK_ESTROGEN_RESPONSE_LATE    |
| 6.57E-03 | HALLMARK_MYOGENESIS                |
| 6.67E-03 | HALLMARK_APOPTOSIS                 |
| 6.89E-03 | HALLMARK_UV_RESPONSE_UP            |
| 6.48E-03 | HALLMARK_HEME_METABOLISM           |
| 8.08E-03 | HALLMARK_MTORC1_SIGNALING          |
| 1.11E-02 | HALLMARK_COMPLEMENT                |
| 1.23E-02 | HALLMARK_ADIPOGENESIS              |
| 1.25E-02 | HALLMARK_KRAS_SIGNALING_UP         |
| 2.34E-02 | HALLMARK_ESTROGEN_RESPONSE_EARLY   |
| 3.09E-02 | HALLMARK_IL2_STAT5_SIGNALING       |
| 4.57E-02 | HALLMARK_PEROXISOME                |
| 9.33E-02 | HALLMARK_ANGIOGENESIS              |
| 1.11E-01 | HALLMARK_IL6_JAK_STAT3_SIGNALING   |
| 1.43E-01 | HALLMARK_APICAL_SURFACE            |
| 1.47E-01 | HALLMARK_PROTEIN_SECRETION         |
| 1.72E-01 | HALLMARK_OXIDATIVE_PHOSPHORYLATION |
| 1.95E-01 | HALLMARK_ANDROGEN_RESPONSE         |
| 1.98E-01 | HALLMARK_KRAS_SIGNALING_DN         |

**Downregulated in OT**

|          |                                            |
|----------|--------------------------------------------|
| 0.00E+00 | HALLMARK_E2F_TARGETS                       |
| 0.00E+00 | HALLMARK_G2M_CHECKPOINT                    |
| 0.00E+00 | HALLMARK_MYC_TARGETS_V1                    |
| 0.00E+00 | HALLMARK_MYC_TARGETS_V2                    |
| 1.38E-04 | HALLMARK_MITOTIC_SPINDLE                   |
| 3.37E-03 | HALLMARK_HYPOXIA                           |
| 4.98E-03 | HALLMARK_UV_RESPONSE_DN                    |
| 6.41E-03 | HALLMARK_UNFOLDED_PROTEIN_RESPONSE         |
| 8.88E-03 | HALLMARK_EPITHELIAL_MESENCHYMAL_TRANSITION |
| 8.51E-03 | HALLMARK_TNFA_SIGNALING_VIA_NFKB           |
| 2.40E-02 | HALLMARK_APICAL_JUNCTION                   |
| 5.91E-02 | HALLMARK_DNA_REPAIR                        |
